# Supplementary material
Source: MDPI journal article supplement (https://www.mdpi.com/1999-4907/13/5/736)
Supplement: s1 [file s1]

# **Supplemental Material**

## **Forest area, CO<sub>2</sub> emission, and COVID-19 case-fatality rate: a worldwide ecological study using spatial regression analysis**

Hansen Li, Guodong Zhang, Yang Cao

### **TABLE OF CONTENTS**

Figure S1. Pairwise scatter plots and Pearson's correlation coefficients of the independent variables.

Figure S2. Strength and decay of the spatial autocorrelation between pair of locations.

Table S1. Changes in COVID-19 CFR (‰) per 10% increase in the ecological and socioeconomic variables (including forest area per capita instead of forest cover)

Table S2. Changes in COVID-19 CFR (‰) per 10% increase in the ecological and socioeconomic variables (including GDP per capita instead of CO<sub>2</sub> emission per capita)

Table S3. Changes in COVID-19 CFR (‰) per 10% increase in the ecological and socioeconomic variables (including GDP per capita instead of CO<sub>2</sub> emission per capita; and forest area per capita instead of forest cover)

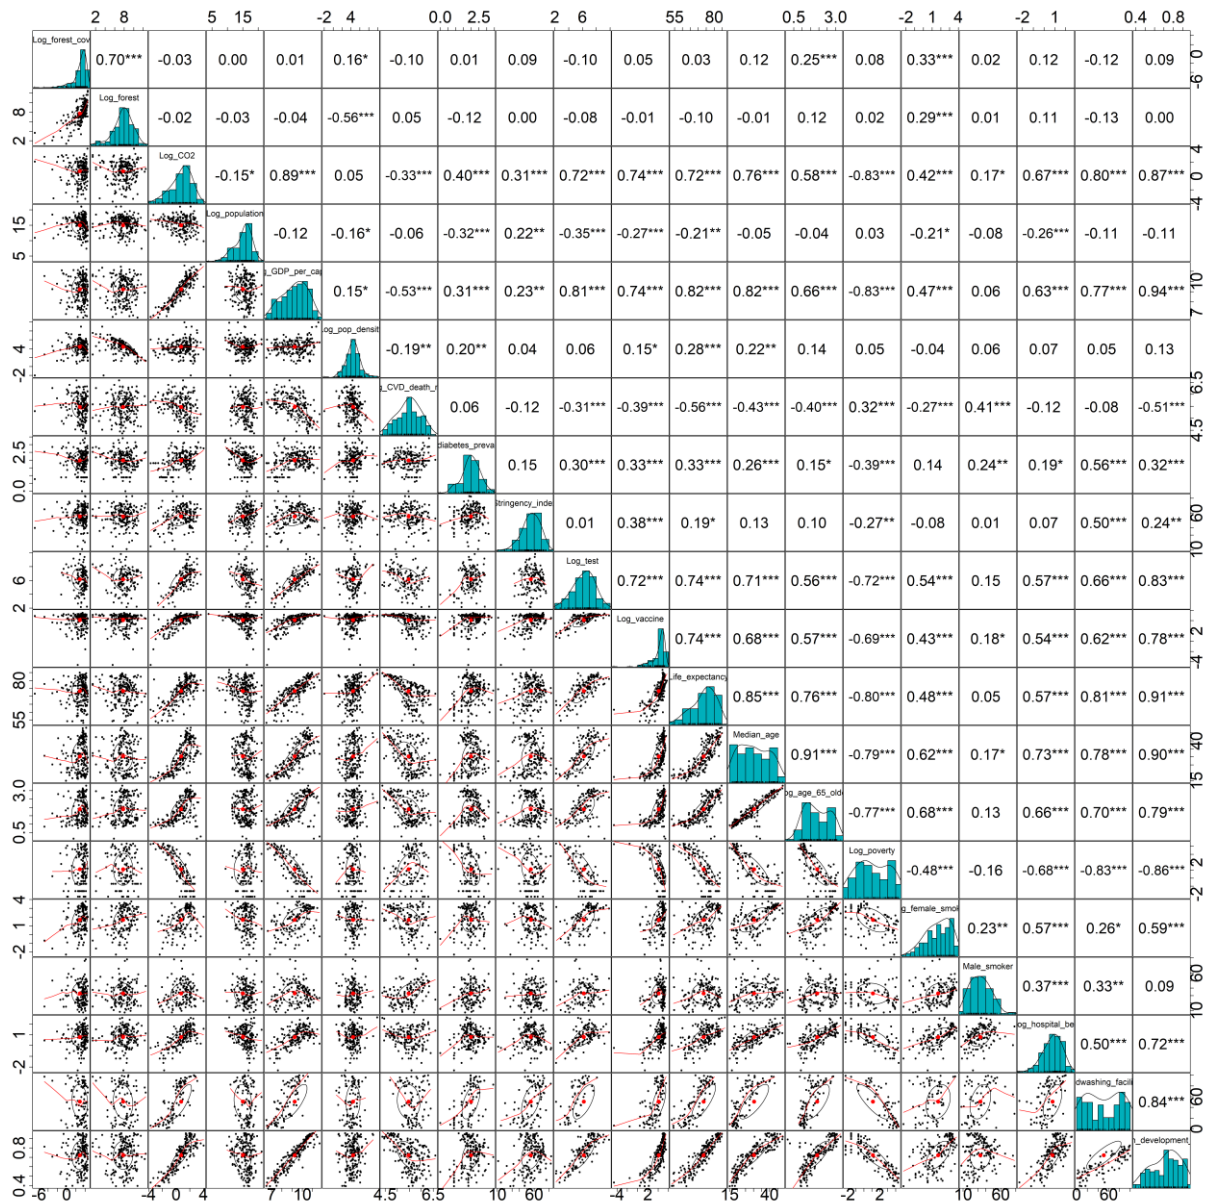

**Figure S1.** Pairwise scatter plots and Pearson's correlation coefficients of the independent variables. \* $P < 0.05$ , \*\* $P < 0.01$ , \*\*\* $P < 0.001$ .

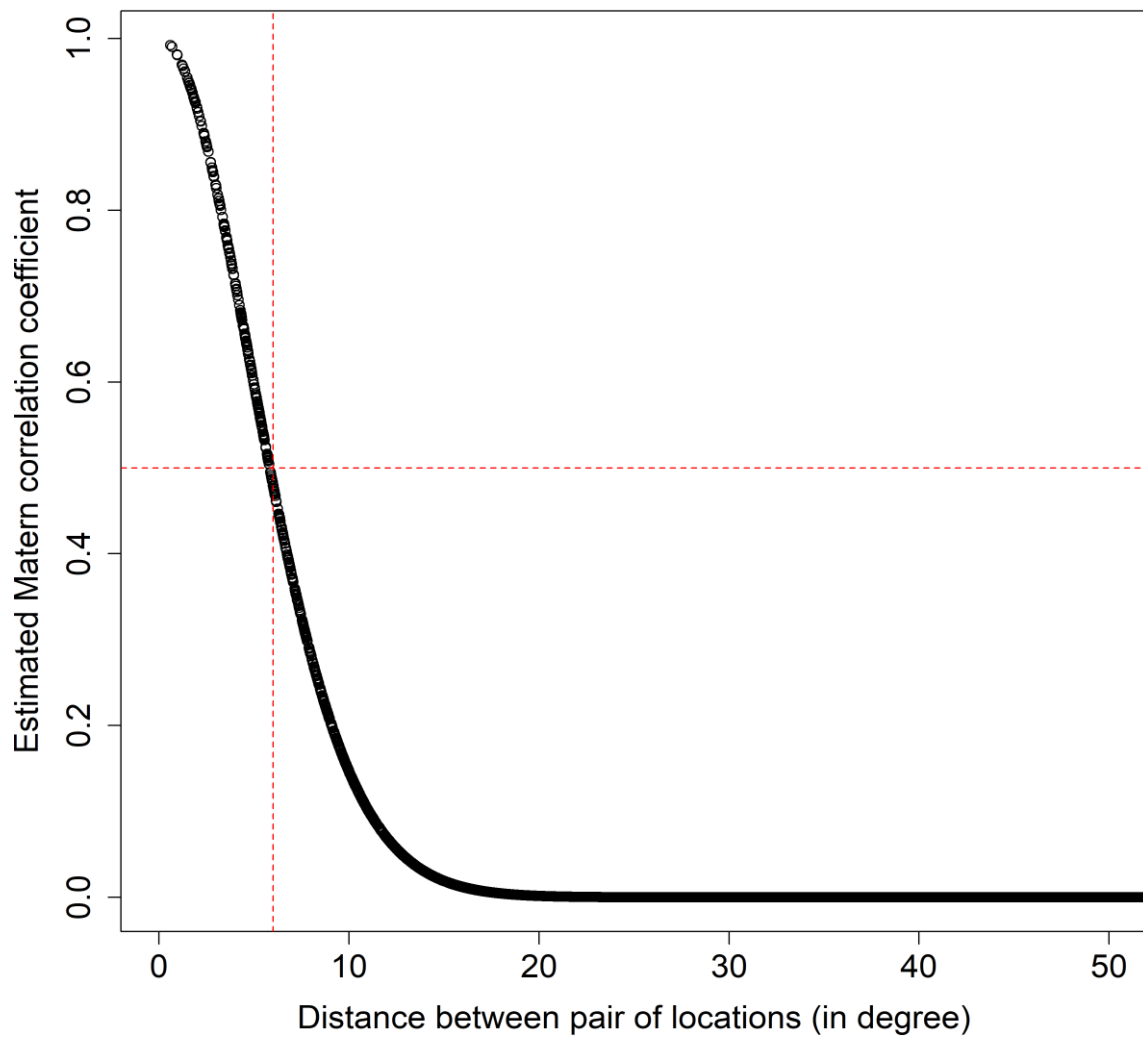

**Figure S2.** Strength and decay of the spatial autocorrelation between pair of locations.

**Table S1.** Changes in COVID-19 CFR (%) per 10% increase in the ecological and socioeconomic variables (including forest area per capita instead of forest cover)

| Variables                                 | All countries (N=186)       |                  | Low-income countries (N=26) |                  | Lower-middle-income countries (N=50) |              | Upper-middle-income countries (N=51) |              | High-income countries (N=59) |                  |
|-------------------------------------------|-----------------------------|------------------|-----------------------------|------------------|--------------------------------------|--------------|--------------------------------------|--------------|------------------------------|------------------|
|                                           | CFR change (95% CI)         | p-value          | CFR change (95% CI)         | p-value          | CFR change (95% CI)                  | p-value      | CFR change (95% CI)                  | p-value      | CFR change (95% CI)          | p-value          |
| <b>Forest area per capita</b>             | -0.05 (-0.25, 0.15)         | 0.617            | <b>-1.89 (-2.38, -1.41)</b> | <b>&lt;0.001</b> | -0.16 (-0.44, 0.13)                  | 0.318        | 0.22 (-0.15, 0.59)                   | 0.264        | 0.02 (-0.05, 0.09)           | 0.514            |
| <b>CO<sub>2</sub> emission per capita</b> | -0.25 (-0.64, 0.13)         | 0.218            | 0.70 (-0.05, 1.45)          | 0.196            | <b>-0.69 (-1.21, -0.17)</b>          | <b>0.022</b> | 0.18 (-0.79, 1.15)                   | 0.616        | -0.14 (-0.34, 0.06)          | 0.254            |
| Population                                | 0.03 (-0.13, 0.20)          | 0.662            | 0.44 (-0.07, 0.96)          | 0.337            | <b>0.25 (0.01, 0.49)</b>             | <b>0.009</b> | 0.14 (-0.17, 0.45)                   | 0.400        | 0.04 (-0.03, 0.10)           | 0.316            |
| Population density                        | -0.14 (-0.41, 0.13)         | 0.336            | <b>-4.33 (-5.45, -3.22)</b> | <b>0.002</b>     | -0.21 (-0.62, 0.19)                  | 0.342        | 0.05 (-0.46, 0.56)                   | 0.666        | 0.04 (-0.05, 0.14)           | 0.387            |
| Life expectancy                           | <b>0.12 (0.04, 0.21)</b>    | <b>0.004</b>     | <b>0.72 (0.56, 0.87)</b>    | <b>&lt;0.001</b> | 0.07 (-0.02, 0.16)                   | 0.190        | 0.10 (-0.04, 0.23)                   | 0.182        | 0.02 (-0.04, 0.08)           | 0.403            |
| Male smoker                               | -0.01 (-0.03, 0.02)         | 0.457            | <b>0.02 (-0.06, 0.1)</b>    | <b>0.034</b>     | 0.00 (-0.02, 0.02)                   | 0.519        | 0.00 (-0.05, 0.04)                   | 0.586        | -0.01 (-0.03, 0.01)          | 0.223            |
| Female smoker                             | 0.18 (-0.08, 0.45)          | 0.309            | <b>2.18 (1.76, 2.61)</b>    | <b>0.008</b>     | 0.16 (-0.24, 0.55)                   | 0.507        | 0.04 (-0.38, 0.45)                   | 0.570        | <b>0.39 (0.20, 0.57)</b>     | <b>0.001</b>     |
| CVD death rate                            | <b>1.14 (0.20, 2.08)</b>    | <b>0.037</b>     | -3.55 (-6.34, -0.77)        | 0.167            | -0.53 (-1.71, 0.64)                  | 0.409        | -0.65 (-2.02, 0.71)                  | 0.405        | <b>1.01 (0.54, 1.49)</b>     | <b>&lt;0.001</b> |
| Diabetes prevalence                       | 0.26 (-0.37, 0.90)          | 0.448            | -1.29 (-2.26, -0.33)        | 0.101            | -0.09 (-0.60, 0.42)                  | 0.548        | -0.38 (-1.90, 1.14)                  | 0.638        | 0.27 (-0.09, 0.63)           | 0.190            |
| Hospital beds                             | -0.10 (-0.58, 0.38)         | 0.584            | <b>3.87 (2.73, 5.01)</b>    | <b>0.008</b>     | -0.24 (-0.82, 0.35)                  | 0.478        | 0.03 (-0.99, 1.05)                   | 0.756        | 0.18 (-0.10, 0.47)           | 0.292            |
| Stringency index                          | -0.01 (-0.04, 0.01)         | 0.365            | -0.01 (-0.05, 0.03)         | 0.103            | <b>0.02 (0.00, 0.04)</b>             | <b>0.041</b> | -0.01 (-0.05, 0.04)                  | 0.560        | <b>0.05 (0.03, 0.06)</b>     | <b>&lt;0.001</b> |
| Tests                                     | <b>-0.80 (-1.09, -0.50)</b> | <b>&lt;0.001</b> | -0.71 (-1.54, 0.11)         | 0.190            | -0.08 (-0.46, 0.30)                  | 0.474        | <b>-0.95 (-1.54, -0.36)</b>          | <b>0.007</b> | <b>-0.35 (-0.47, -0.22)</b>  | <b>&lt;0.001</b> |
| Vaccinations                              | 0.21 (-0.09, 0.52)          | 0.203            | -0.32 (-0.76, 0.12)         | 0.150            | 0.07 (-0.32, 0.46)                   | 0.735        | -0.58 (-1.40, 0.24)                  | 0.197        | -0.09 (-0.71, 0.52)          | 0.624            |

CFR, case fatality rate; CI, confidence interval; CVD, cardiovascular diseases

**Table S2.** Changes in COVID-19 CFR (%) per 10% increase in the ecological and socioeconomic variables (including GDP per capita instead of CO<sub>2</sub> emission per capita)

| Variables                   | All countries (N=186)       |                  | Low-income countries (N=26) |                 | Lower-middle-income countries (N=50) |                 | Upper-middle-income countries (N=51) |                 | High-income countries (N=59) |                  |
|-----------------------------|-----------------------------|------------------|-----------------------------|-----------------|--------------------------------------|-----------------|--------------------------------------|-----------------|------------------------------|------------------|
|                             | CFR change (95% CI)         | <i>p</i> -value  | CFR change (95% CI)         | <i>p</i> -value | CFR change (95% CI)                  | <i>p</i> -value | CFR change (95% CI)                  | <i>p</i> -value | CFR change (95% CI)          | <i>p</i> -value  |
| <b>Forest coverage rate</b> | 0.05 (-0.03, 0.12)          | 0.321            | <b>-2.25 (-2.92, -1.57)</b> | <b>0.007</b>    | 0.03 (-0.25, 0.3)                    | 0.572           | 0.14 (-0.19, 0.47)                   | 0.455           | 0.05 (-0.03, 0.12)           | 0.321            |
| <b>GDP per capita</b>       | 0.01 (-0.33, 0.34)          | 0.729            | <b>-4.21 (-7.09, -1.32)</b> | <b>0.020</b>    | <b>-0.96 (-1.74, -0.18)</b>          | <b>0.020</b>    | -0.59 (-1.77, 0.59)                  | 0.378           | 0.01 (-0.33, 0.34)           | 0.729            |
| Population                  | 0.02 (-0.04, 0.07)          | 0.555            | 1.75 (0.97, 2.52)           | 0.103           | 0.23 (-0.04, 0.5)                    | 0.171           | 0.24 (-0.02, 0.5)                    | 0.084           | 0.02 (-0.04, 0.07)           | 0.555            |
| Population density          | 0.03 (-0.05, 0.11)          | 0.498            | -0.14 (-1.1, 0.83)          | 0.111           | -0.13 (-0.47, 0.22)                  | 0.471           | -0.27 (-0.62, 0.09)                  | 0.199           | 0.03 (-0.05, 0.11)           | 0.498            |
| Life expectancy             | 0.02 (-0.03, 0.08)          | 0.469            | <b>0.67 (0.46, 0.88)</b>    | <b>0.001</b>    | 0.04 (-0.07, 0.14)                   | 0.514           | 0.12 (-0.01, 0.25)                   | 0.078           | 0.02 (-0.03, 0.08)           | 0.469            |
| Male smoker                 | -0.01 (-0.03, 0.00)         | 0.122            | 0.14 (0.02, 0.27)           | 0.100           | 0.00 (-0.02, 0.02)                   | 0.455           | -0.02 (-0.06, 0.03)                  | 0.410           | -0.01 (-0.03, 0)             | 0.122            |
| Female smoker               | <b>0.43 (0.25, 0.62)</b>    | <b>&lt;0.001</b> | <b>1.89 (1.41, 2.37)</b>    | <b>0.025</b>    | 0.19 (-0.23, 0.62)                   | 0.278           | -0.01 (-0.39, 0.36)                  | 0.531           | <b>0.43 (0.25, 0.62)</b>     | <b>&lt;0.001</b> |
| CVD death rate              | <b>1.04 (0.57, 1.52)</b>    | <b>&lt;0.001</b> | 5.65 (2.71, 8.58)           | 0.061           | <b>-1.61 (-2.67, -0.55)</b>          | <b>0.043</b>    | -0.59 (-1.91, 0.73)                  | 0.396           | <b>1.04 (0.57, 1.52)</b>     | <b>&lt;0.001</b> |
| Diabetes prevalence         | 0.31 (-0.05, 0.67)          | 0.126            | 2.04 (0.54, 3.55)           | 0.049           | 0.48 (-0.13, 1.08)                   | 0.208           | 0.03 (-1.48, 1.55)                   | 0.774           | 0.31 (-0.05, 0.67)           | 0.126            |
| Hospital beds               | 0.11 (-0.18, 0.41)          | 0.487            | <b>1.59 (0.16, 3.03)</b>    | <b>0.025</b>    | 0.02 (-0.67, 0.7)                    | 0.699           | 0.37 (-0.63, 1.36)                   | 0.513           | 0.11 (-0.18, 0.41)           | 0.487            |
| Stringency index            | <b>0.05 (0.03, 0.06)</b>    | <b>&lt;0.001</b> | <b>0.08 (0.01, 0.15)</b>    | <b>0.031</b>    | 0.02 (-0.01, 0.05)                   | 0.081           | -0.03 (-0.07, 0.02)                  | 0.302           | <b>0.05 (0.03, 0.06)</b>     | <b>&lt;0.000</b> |
| Tests                       | <b>-0.35 (-0.49, -0.22)</b> | <b>&lt;0.001</b> | -1.91 (-2.77, -1.04)        | 0.061           | -0.50 (-0.91, -0.08)                 | 0.166           | <b>-0.87 (-1.47, -0.28)</b>          | <b>0.008</b>    | <b>-0.35 (-0.49, -0.22)</b>  | <b>&lt;0.001</b> |
| Vaccinations                | -0.03 (-0.64, 0.59)         | 0.475            | -0.01 (-0.53, 0.51)         | 0.211           | 0.16 (-0.27, 0.59)                   | 0.531           | -0.6 (-1.41, 0.21)                   | 0.200           | -0.03 (-0.64, 0.59)          | 0.475            |

CFR, case fatality rate; CI, confidence interval; CVD, cardiovascular diseases

**Table S3.** Changes in COVID-19 CFR (%) per 10% increase in the ecological and socioeconomic variables (including GDP per capita instead of CO<sub>2</sub> emission per capita; and forest area per capita instead of forest cover)

| Variables                     | All countries (N=186)       |                  | Low-income countries (N=26) |                 | Lower-middle-income countries (N=50) |                 | Upper-middle-income countries (N=51) |                 | High-income countries (N=59) |                  |
|-------------------------------|-----------------------------|------------------|-----------------------------|-----------------|--------------------------------------|-----------------|--------------------------------------|-----------------|------------------------------|------------------|
|                               | CFR change (95% CI)         | <i>p</i> -value  | CFR change (95% CI)         | <i>p</i> -value | CFR change (95% CI)                  | <i>p</i> -value | CFR change (95% CI)                  | <i>p</i> -value | CFR change (95% CI)          | <i>p</i> -value  |
| <b>Forest area per capita</b> | -0.04 (-0.23, 0.16)         | 0.666            | <b>-2.12 (-2.75, -1.50)</b> | <b>0.005</b>    | -0.15 (-0.44, 0.13)                  | 0.416           | 0.19 (-0.16, 0.53)                   | 0.336           | 0.03 (-0.04, 0.10)           | 0.493            |
| <b>GDP per capita</b>         | -0.41 (-0.95, 0.13)         | 0.161            | 1.02 (-1.87, 3.91)          | 0.364           | <b>-0.73 (-1.44, -0.03)</b>          | <b>0.014</b>    | -0.46 (-1.68, 0.76)                  | 0.522           | -0.01 (-0.35, 0.32)          | 0.774            |
| Population                    | 0.06 (-0.08, 0.21)          | 0.411            | 0.54 (-0.29, 1.37)          | 0.211           | 0.25 (-0.01, 0.51)                   | 0.144           | 0.23 (-0.04, 0.50)                   | 0.132           | 0.02 (-0.03, 0.08)           | 0.522            |
| Population density            | -0.15 (-0.41, 0.11)         | 0.275            | <b>-3.95 (-5.36, -2.54)</b> | <b>0.002</b>    | -0.20 (-0.61, 0.21)                  | 0.368           | -0.02 (-0.54, 0.50)                  | 0.692           | 0.05 (-0.04, 0.15)           | 0.371            |
| Life expectancy               | <b>0.12 (0.04, 0.2)</b>     | <b>0.007</b>     | <b>0.60 (0.39, 0.81)</b>    | <b>0.002</b>    | 0.05 (-0.05, 0.15)                   | 0.367           | 0.10 (-0.03, 0.23)                   | 0.175           | 0.01 (-0.05, 0.07)           | 0.501            |
| Male smoker                   | 0.00 (-0.03, 0.02)          | 0.709            | 0.11 (-0.05, 0.26)          | 0.120           | 0.00 (-0.02, 0.03)                   | 0.426           | -0.01 (-0.06, 0.03)                  | 0.496           | -0.01 (-0.03, 0.01)          | 0.177            |
| Female smoker                 | 0.21 (-0.06, 0.48)          | 0.234            | <b>1.26 (0.61, 1.92)</b>    | <b>0.013</b>    | 0.23 (-0.21, 0.67)                   | 0.425           | 0.00 (-0.40, 0.41)                   | 0.545           | <b>0.47 (0.30, 0.65)</b>     | <b>&lt;0.001</b> |
| CVD death rate                | 0.75 (-0.21, 1.72)          | 0.143            | 0.24 (-3.36, 3.83)          | 0.110           | <b>-1.47 (-2.55, -0.39)</b>          | <b>0.008</b>    | -0.72 (-2.06, 0.61)                  | 0.316           | <b>0.98 (0.50, 1.45)</b>     | <b>0.001</b>     |
| Diabetes prevalence           | 0.31 (-0.33, 0.95)          | 0.352            | -1.27 (-2.94, 0.40)         | 0.152           | 0.31 (-0.29, 0.90)                   | 0.375           | 0.03 (-1.53, 1.58)                   | 0.787           | 0.30 (-0.05, 0.66)           | 0.121            |
| Hospital beds                 | -0.20 (-0.67, 0.27)         | 0.444            | <b>2.33 (0.76, 3.90)</b>    | <b>0.025</b>    | -0.15 (-0.73, 0.44)                  | 0.537           | 0.33 (-0.65, 1.32)                   | 0.515           | 0.13 (-0.16, 0.41)           | 0.406            |
| Stringency index              | -0.01 (-0.04, 0.01)         | 0.313            | -0.01 (-0.09, 0.07)         | 0.151           | <b>0.02 (0.00, 0.05)</b>             | <b>0.034</b>    | -0.02 (-0.06, 0.03)                  | 0.445           | <b>0.05 (0.03, 0.06)</b>     | <b>&lt;0.001</b> |
| Tests                         | <b>-0.70 (-1.00, -0.41)</b> | <b>&lt;0.001</b> | -1.12 (-2.07, -0.16)        | 0.089           | -0.30 (-0.72, 0.12)                  | 0.226           | <b>-0.82 (-1.43, -0.21)</b>          | <b>0.017</b>    | <b>-0.35 (-0.48, -0.23)</b>  | <b>&lt;0.001</b> |
| Vaccinations                  | 0.19 (-0.11, 0.49)          | 0.228            | -0.07 (-0.62, 0.49)         | 0.203           | 0.05 (-0.35, 0.46)                   | 0.699           | -0.69 (-1.49, 0.12)                  | 0.114           | -0.03 (-0.65, 0.59)          | 0.654            |

CFR, case fatality rate; CI, confidence interval; CVD, cardiovascular diseases
